# Supplementary material for: SMALL GRAIN 11 Controls Grain Size, Grain Number and Grain Yield in Rice
Source: PubMed Central journal article supplement (PMC5127926; doi:10.1186/s12284-016-0136-z), 2016-11-29
Supplement: 12284_2016_136_MOESM1_ESM.pdf [file 12284_2016_136_MOESM1_ESM.pdf]

---

| No.  | Chromosome | Position | Reference | Alteration | Gene           | Note          |
|------|------------|----------|-----------|------------|----------------|---------------|
| SNP1 | Chr1       | 5236843  | C         | T          | LOC_Os01g10040 | nonsynonymous |
| SNP2 | Chr1       | 5655212  | C         | T          | LOC_Os01g10590 | synonymous    |

---

**Figure S1. Identification of the *smg11* mutation.**

The whole genome sequencing reveals the SNP1 and SNP2 in the gene regions that are associated with the *smg11* phenotype.

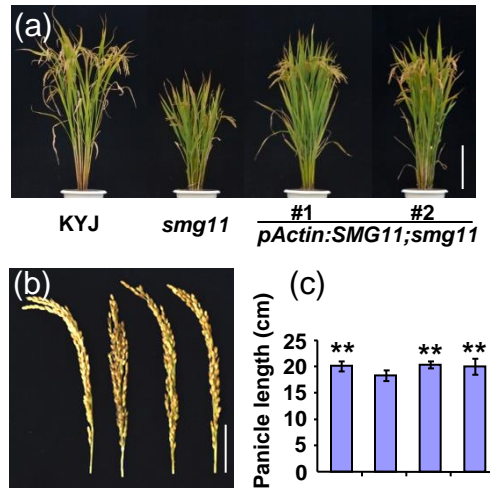

**Figure S2. Overexpression of *SMG11* complements the phenotypes of *smg11*.**

(a) Plants of KYJ, *smg11*, *pActin:SMG11;smg11#1* and *pActin:SMG11;smg11#2*.

*pActin:SMG11;smg11* is *smg11* transformed with *pActin:SMG11*.

(b) Panicles of KYJ, *smg11*, *pActin:SMG11;smg11#1* and *pActin:SMG11;smg11#2*.

(c) Panicle length of KYJ, *smg11*, *pActin:SMG11;smg11#1* and *pActin:SMG11;smg11#2*.

Values (c) are given as mean  $\pm$  SD. \*\*P < 0.01 compared with *smg11* by Student's t-test.

Bars: 20cm in (a), 5 cm in (b).

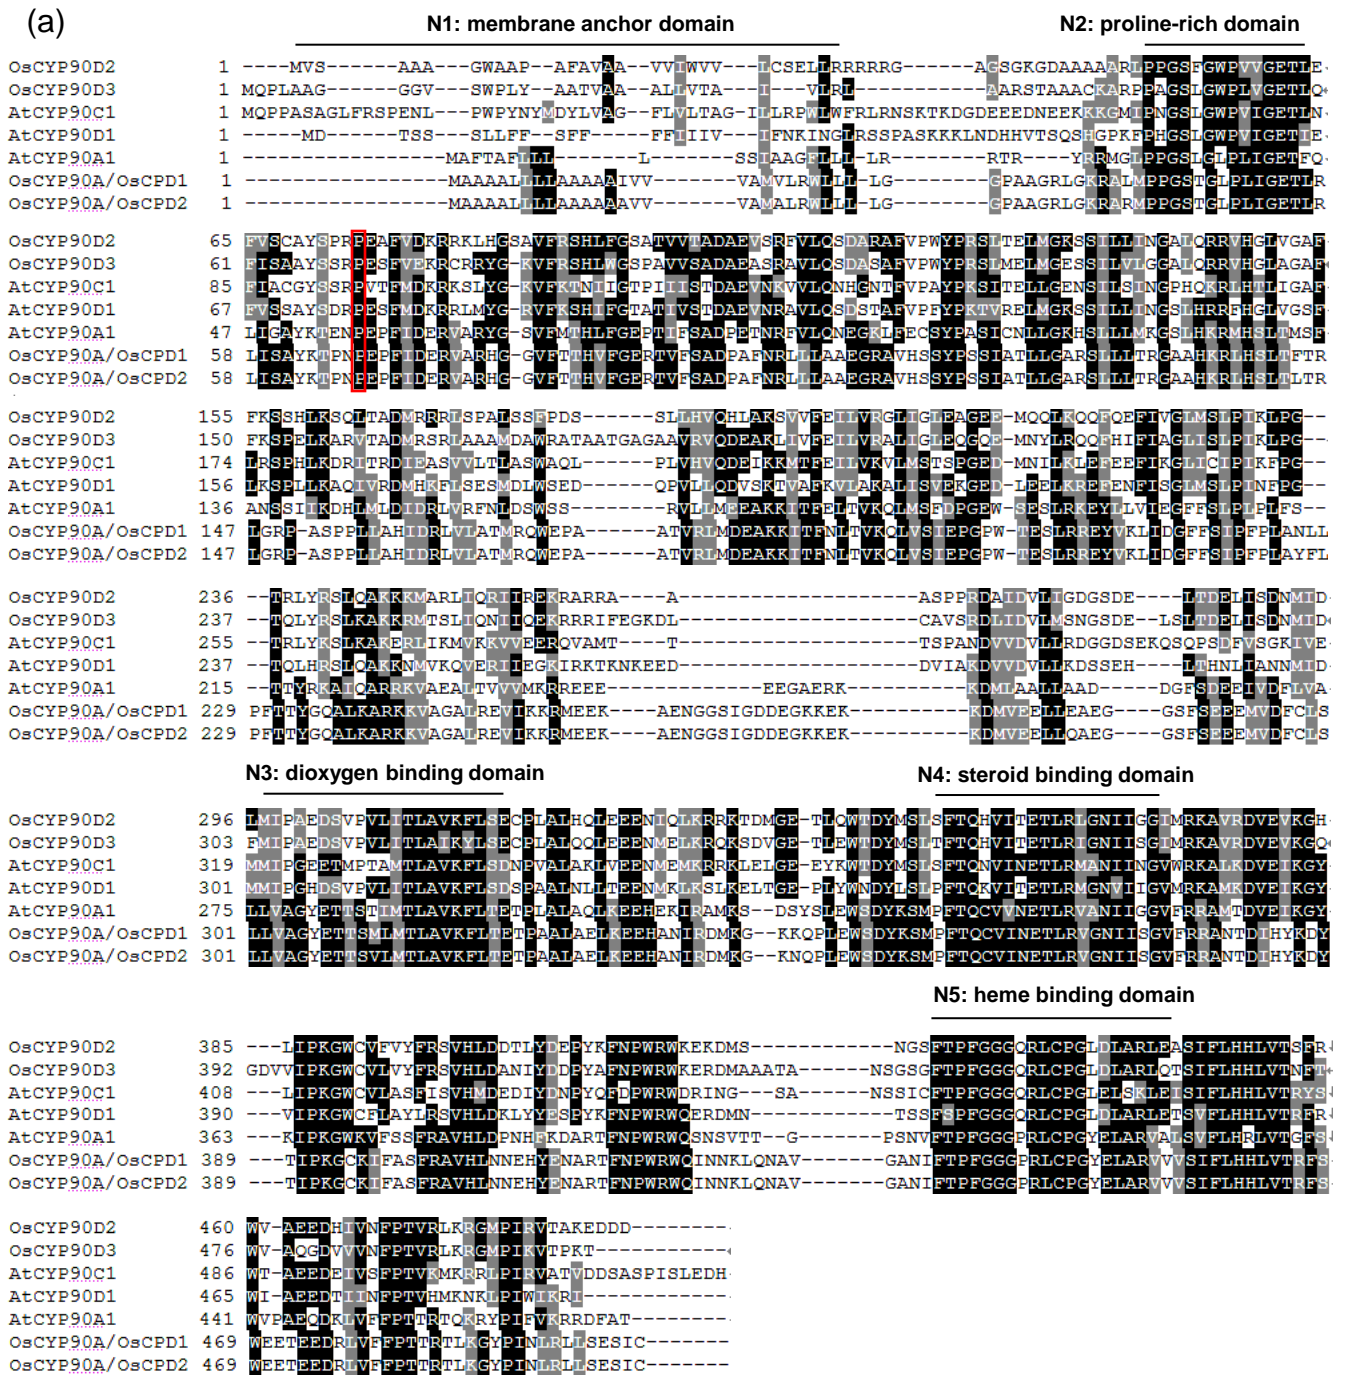

Figure S3. Alignment of D2/SMG11 homologs in rice and Arabidopsis.

The red box shows the conserved amino acid (Pro) at the position 74. The predicted domains are shown.

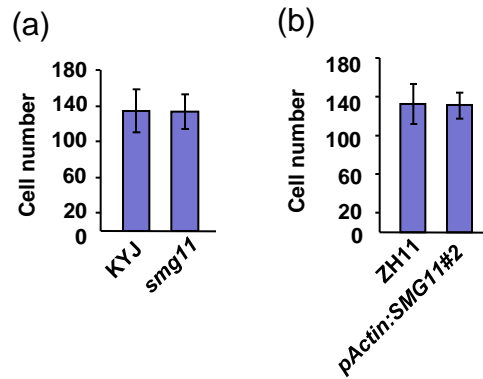

**Figure S4. Effects of *SMG11* on cell number in spikelet hulls.**

(a) The calculated number of outer epidermal cells in the grain-length direction in KYJ and *smg11* lemmas.

(b) The calculated number of outer epidermal cells in the grain-length direction in ZH11 and *pActin:SMG11#2* lemmas.

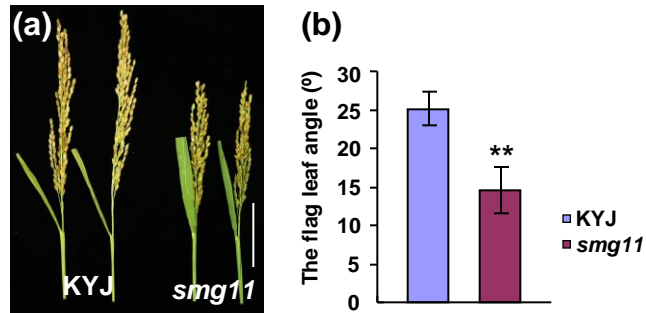

**Figure S5. *smg11* influences leaf angle.**

(a) Comparison of KYJ and *smg11* lamina joints at the mature stage.

(b) The flag leaf angle of KYJ and *smg11* plants at the mature stage.

Values (b) are given as mean  $\pm$  SD. \*\*P < 0.01 compared with KYJ by Student's t-test.

Bars: 5cm in (a).

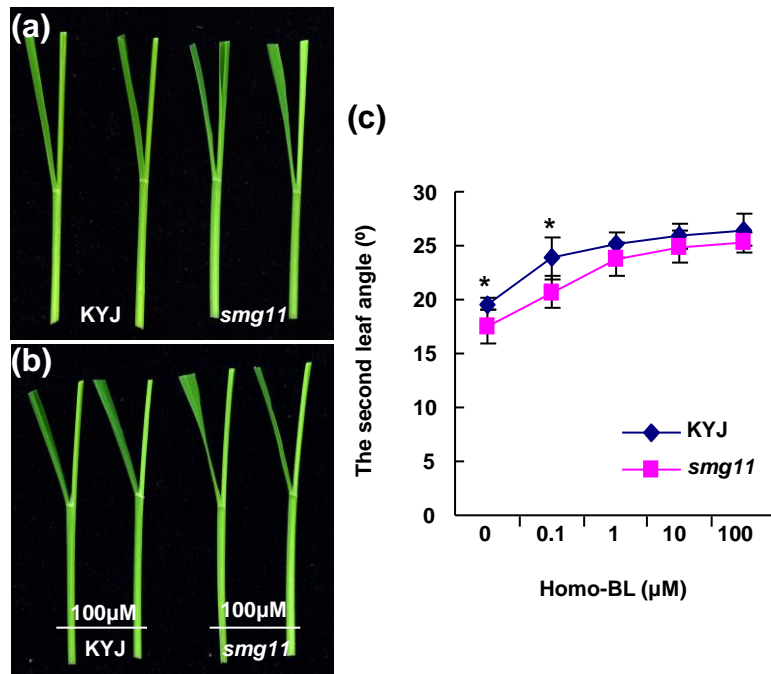

**Figure S6. Exogenous application of BL rescues the leaf angle phenotype of *smg11*.**

(a) The second leaf joint of KYJ and *smg11* seedlings without homo-BL (in the trefoil stage).

(b) The second leaf joint of KYJ and *smg11* seedlings with 100 μM homo-BL (in the trefoil stage).

(c) The second leaf angle of KYJ and *smg11* treated by different concentrations of homo-BL.

Values (c) are given as mean  $\pm$  SD. \*P < 0.05 compared with KYJ by Student's t-test.
